# Supplementary material for: Routes towards catalytically active TiO2doped porous cellulose
Source: Royal Society of Chemistry journal article supplement (doi:10.1039/c5ra03707g), 2015-01-01
Supplement: c5ra03707g1.pdf [file c5ra03707g1.pdf]

## SUPPORTING INFORMATION

### Routes towards catalytically active TiO<sub>2</sub> doped porous cellulose

Alexandra Wittmar<sup>a,b,\*</sup>, Hanna Thierfeld<sup>a,b</sup>, Steffen Köcher<sup>a</sup>, Mathias Ulbricht<sup>a,b\*</sup>

<sup>a</sup>*Lehrstuhl für Technische Chemie II, Universität Duisburg-Essen, 45141 Essen, Germany*

<sup>b</sup>*NETZ – NanoEnergieTechnikZentrum, 47057 Duisburg, Germany*

\*Corresponding authors: Fax: +49 – 201 – 183 3147, e-mail: [alexandra.wittmar@uni-due.de](mailto:alexandra.wittmar@uni-due.de);

[mathias.ulbricht@uni-due.de](mailto:mathias.ulbricht@uni-due.de)

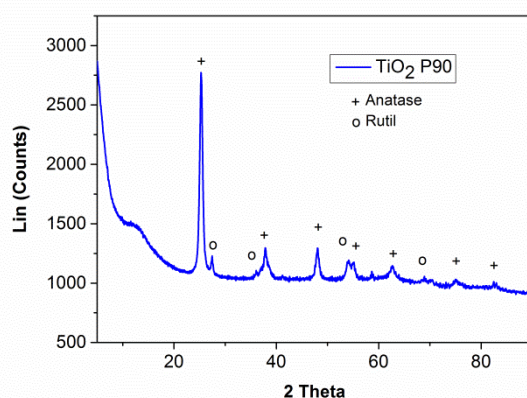

Figure SI-1. X-Ray diffraction pattern for the TiO<sub>2</sub> P90 (Evonik) powder

The following lattice parameters have been calculated using full width at half maximum (FWHM) and integral breadth (IB) methods:

- anatase:  $a = 3.7873$  (5),  $9.506$  (1),  $V = 136.36$  (4), size IB = 10 nm, size FWHM = 14 nm, density =  $3.89 \text{ g/cm}^3$

- rutil:  $a = 4.596$  (1),  $2.958$  (9),  $V = 62.4$  (1), size IB = 12 nm, size FWHM = 17 nm, density =  $4.27 \text{ g/cm}^3$

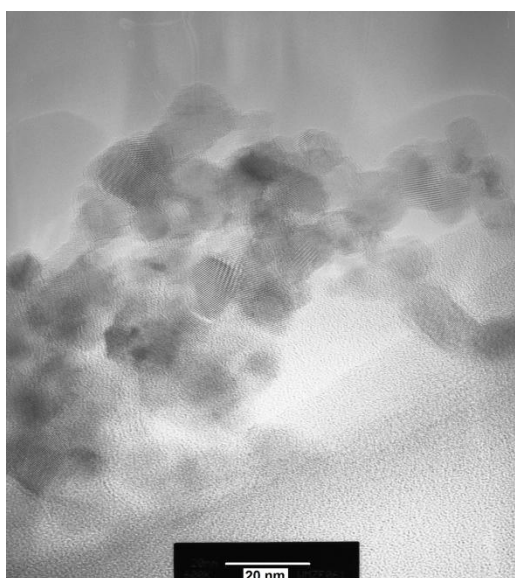

Figure SI-2. Transmission electron micrograph for the TiO<sub>2</sub> P90 (Evonik) powder

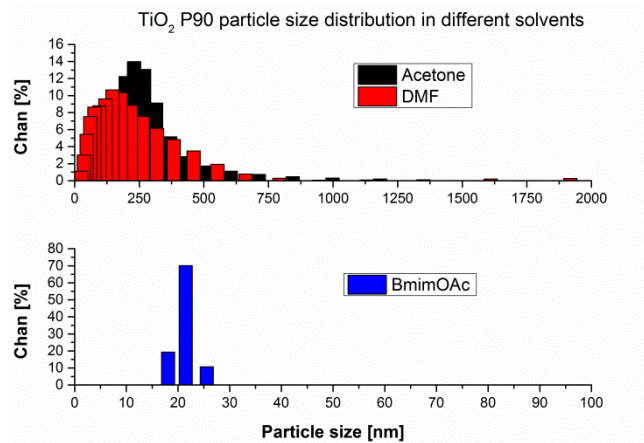

Figure SI-3. TiO<sub>2</sub> P90 (Evonik), 2.5 wt%: Particle size distribution in different solvents estimated by DLS

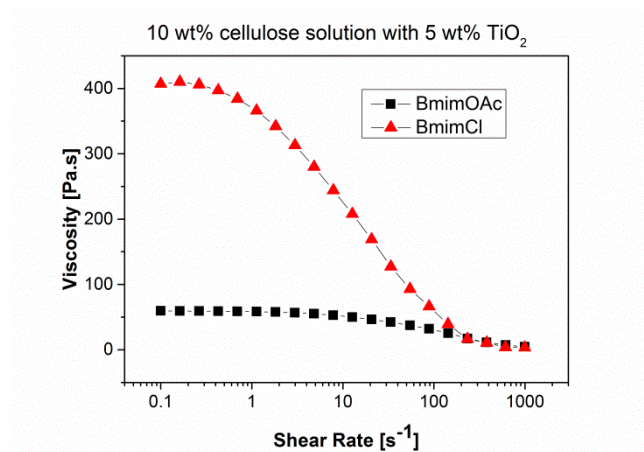

Figure SI-4. Viscosity dependence of the shear rate for 5 wt% TiO<sub>2</sub> Aldrich (relative to polymer) doped cellulose (10 wt%) solutions in two ionic liquids

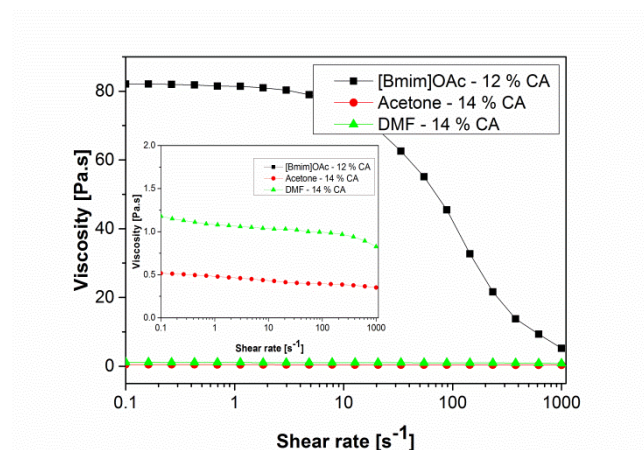

Figure SI-5. Viscosity dependence of the shear rate for cellulose acetate (12 or 14%) solutions in different solvents

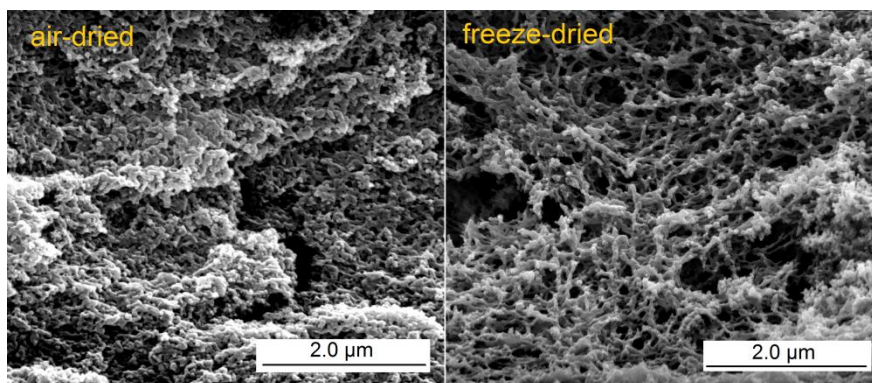

Figure SI-6. Scanning electron microscopy images of  $\text{TiO}_2$  CA films prepared from BmimOAc: Effect of different drying methods

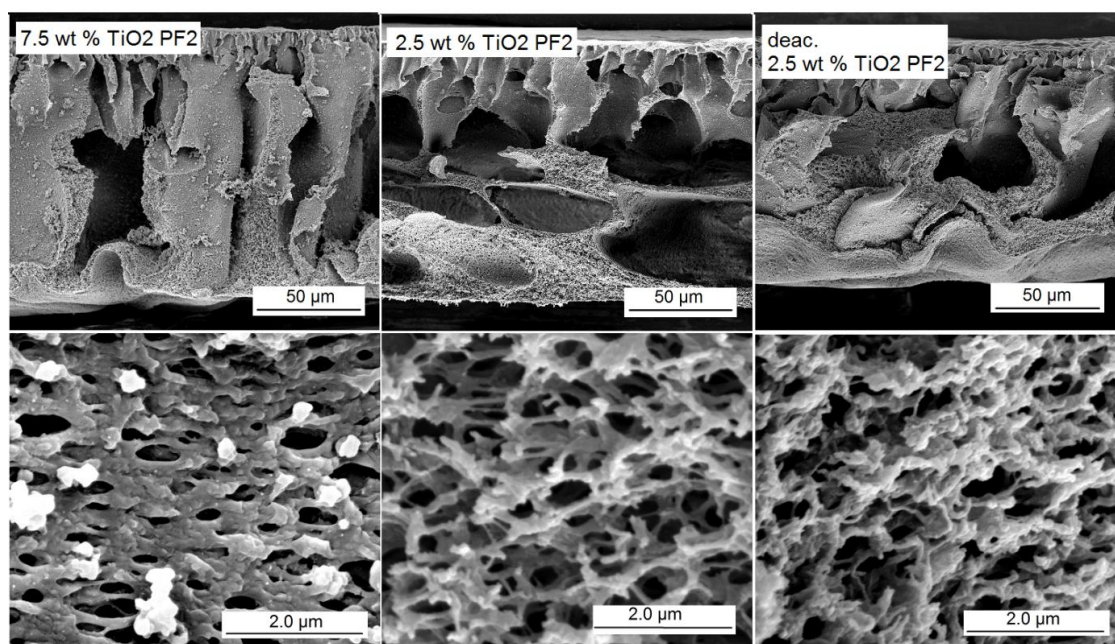

Figure SI-7. Cellulose acetate –  $\text{TiO}_2$  PF2 and corresponding cellulose membranes prepared from DMF solutions

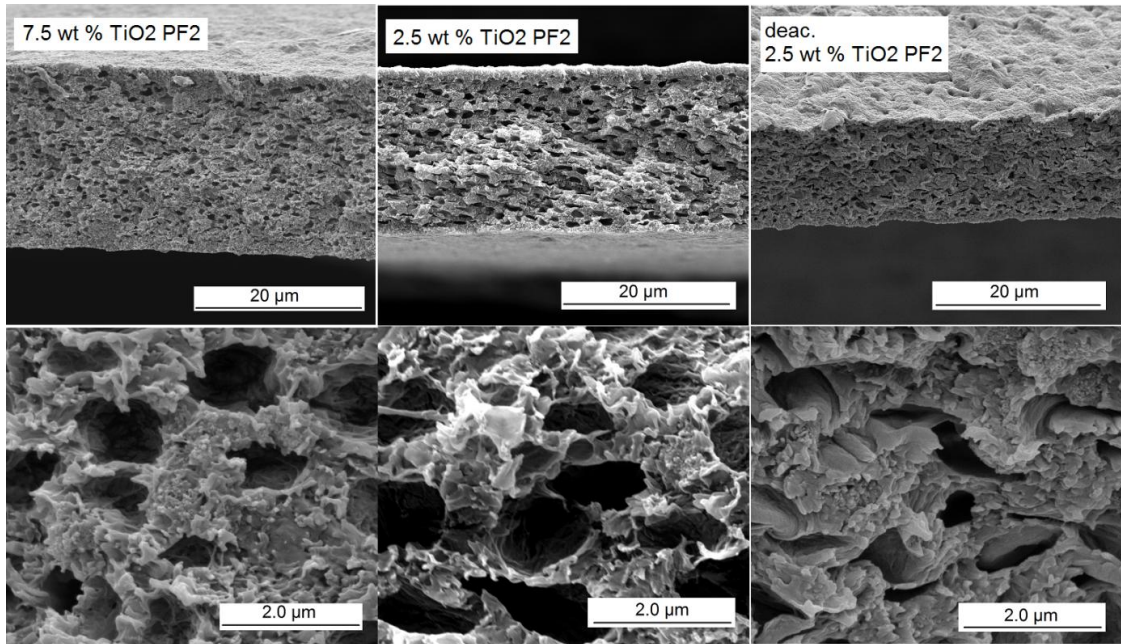

Figure SI-8. Cellulose acetate – TiO<sub>2</sub> PF2 and corresponding cellulose membranes prepared from acetone solutions

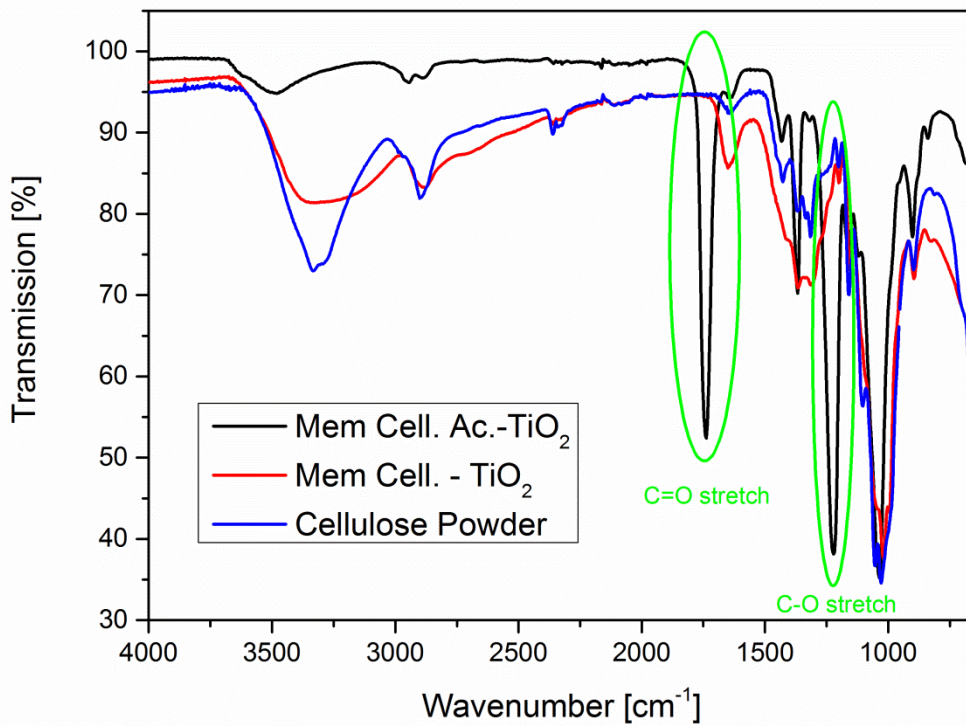

Figure SI-9. FT-IR ATR spectra of cellulose acetate – TiO<sub>2</sub> membrane (Aldrich), of the deacetylated cellulose acetate – TiO<sub>2</sub> (Aldrich) membrane and of the commercial cellulose

Additional activity tests:

Membrane pieces of  $2 \times 2 \text{ cm}^2$  were impregnated with  $10^{-5} \text{ M}$  organic dyes in water: each membrane piece was immersed in 50 ml of dye solution and was maintained there in dark conditions for 30 min. The membrane pieces after removal from dye solution were placed in an open crystallizing dish and exposed to the UV radiation (365 nm) in a TLC CN-15 viewing cabinet from Vilber Lourmat GmbH with 2 x 15 W lamps and intensity at the bottom of  $1050 \mu\text{W}/\text{cm}^2$ . Digital pictures have been taken before UV exposure and after specific periods of time (Test 1). For cellulose acetate based composite membranes pieces of  $2 \times 2 \text{ cm}^2$  were imbued with  $10^{-5} \text{ M}$  organic dyes in water by immersion in 50 ml solutions.

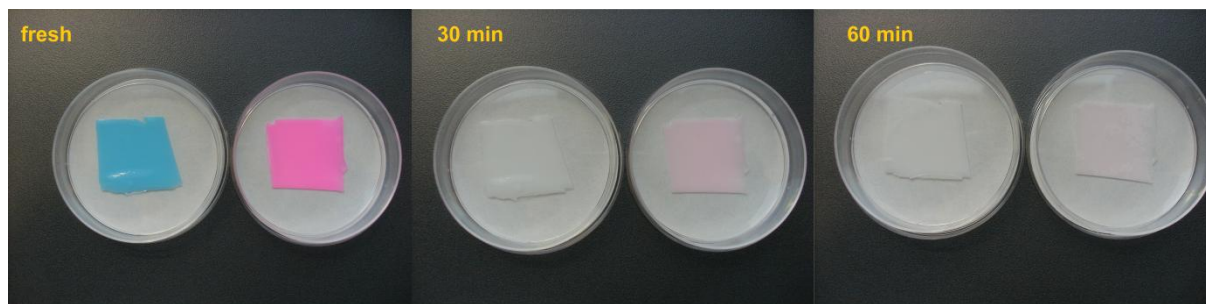

Figure SI-10 Photocatalytic degradation of methylene blue and rhodamine B on cellulose acetate –  $\text{TiO}_2$  P90 (ratio: 10:1) nanocomposite films obtained from DMF solution
